# Supplementary material
Source: PubMed Central journal article supplement (PMC4151769)
Supplement: 1412509111_pnas.201412509SI.pdf [file 1412509111_pnas.201412509SI.pdf]

# Supporting Information

Longoni et al. 10.1073/pnas.1412509111

## SI Methods

**DNA Sample Preparation.** DNA samples were obtained by direct extraction from K3 EDTA preserved whole blood (QIAamp DNA Blood Maxi Kit; Qiagen), skin fibroblast primary cultures (TRIzol Reagent; Life Technologies), or EBV-transformed lymphoblastoid lines (QIAamp DNA Mini Kit; Qiagen), generated as described (1). DNA was concentrated and measured by picogreen (Quant-iT dsDNA Assay Kit, broad range and Qubit Fluorometric Quantitation; Life Technologies). Samples showing fragmented genomic DNA by electrophoresis in 1% agarose

gels were purified and concentrated (DNA Clean & Concentrator-5; Zymo Research).

**Variant Validation.** Selected sequence variants were validated by using Sanger sequencing on proband and parental DNA samples, where available. Variant-specific primers were designed by using the National Center for Biotechnology Information Primer-BLAST ([ncbi.nlm.nih.gov/tools/primer-blast](http://ncbi.nlm.nih.gov/tools/primer-blast)). Sequencing products were resolved on the Applied Biosystems 3730xl DNA Analyzer.

1. Anderson MA, Gusella JF (1984) Use of cyclosporin A in establishing Epstein-Barr virus-transformed human lymphoblastoid cell lines. *In Vitro* 20(11):856–858.

## Other Supporting Information Files

[Dataset S1 \(XLSX\)](#)

[Dataset S2 \(XLSX\)](#)

[Dataset S3 \(XLSX\)](#)

[Dataset S4 \(XLSX\)](#)
